# Supplementary material for: (3R,6E)-nerolidol, a fertility-related volatile secreted by the queens of higher termites (Termitidae: Syntermitinae)
Source: publisher site journal article supplement (doi:10.1515/znc-2018-0197), 2019-03-28
Supplement: Supplementary file 1 [file znc-2018-0197_suppl.docx]

**Contents:**

**Figures**

**Figure S1.** Representative GC×GC chromatogram of a hexane body wash of *E. neotenicus* neotenic queen.

**Figure S2.** 1H NMR spectrum of (2*R*,3*R*)-epoxyfarnesol.

**Figure S3.** 1H NMR spectrum of (3*R*,6*E*)-nerolidol.

**
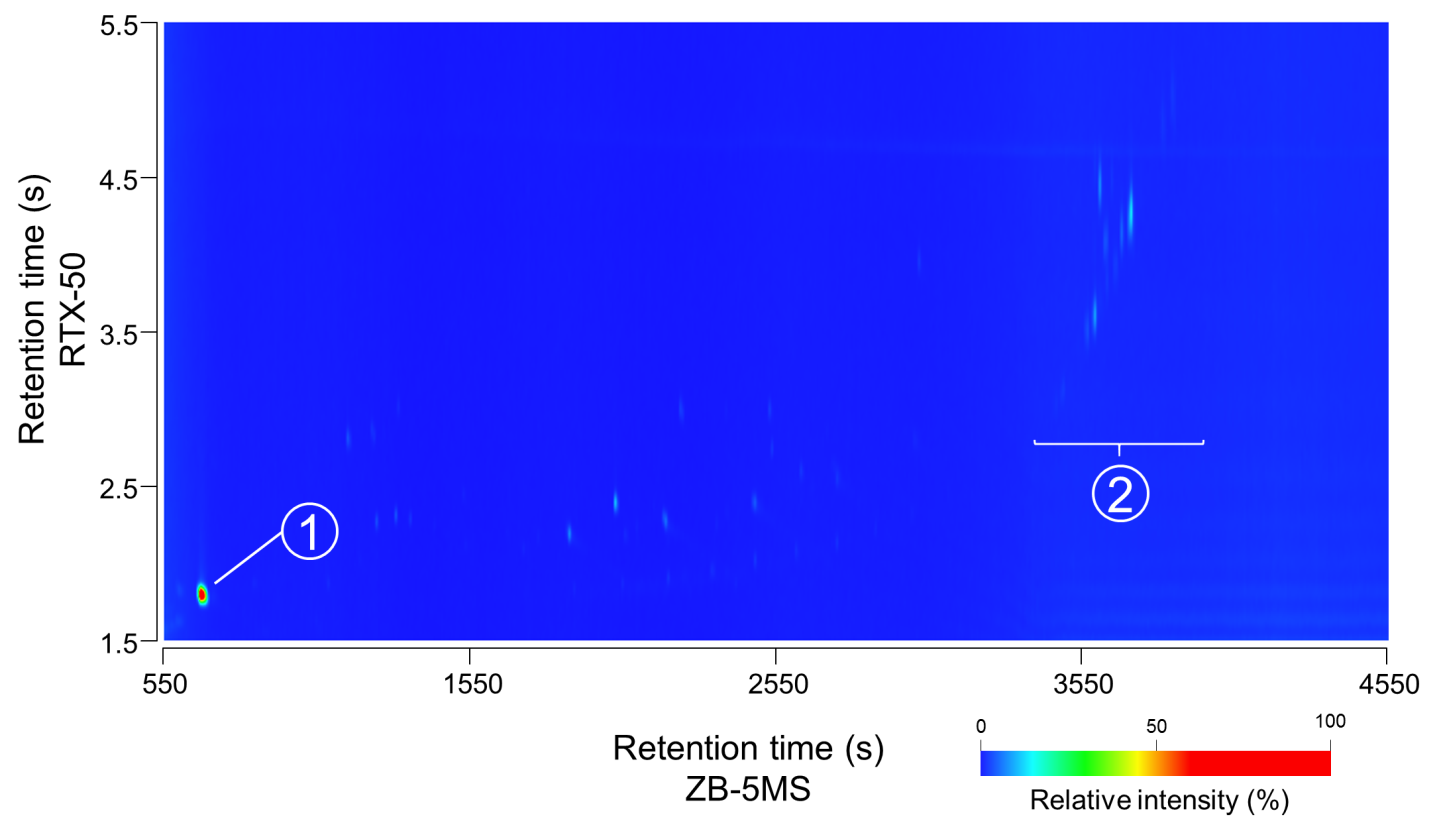
**

**Figure S1:** Representative GC×GC chromatogram of a hexane body wash of *E. neotenicus* neotenic queen. The figure shows a 2D view on a chromatogram spanning from the low molecular weight fraction, including the dominant analyte (3*R*,6*E*)-nerolidol (1), to the high molecular weight fraction, containing the cuticular hydrocarbons (2) with 35‒41 carbons. The temperature program allowing elution of both, (3*R*,6*E*)-nerolidol and cuticular hydrocarbons, was set as follows. Primary column: 150 °C (1 min) to 315 °C at 3 °C/min, 315 °C to 325 °C (20 min) at 10 °C/min).

**Figure S2.** 1H NMR spectrum of (2*R*,3*R*)-epoxyfarnesol.

**Figure S3.** 1H NMR spectrum of (3*R*,6*E*)-nerolidol.
